# Supplementary material for: Assembly of the first polyoxometalate-based hybrid with [ring+helix] channels and photocatalytic activity
Source: Royal Society of Chemistry journal article supplement (doi:10.1039/c3ce41518j), 2013-01-01
Supplement: c3ce41518j.pdf [file c3ce41518j.pdf]

## Supporting information

### Assembly of the first polyoxometalates-based hybrid with [ring+helix] channels and Photocatalytic Activity

Jingwen Sun<sup>a,b</sup>, Mengting Li<sup>b</sup>, Jingquan Sha<sup>a,b\*</sup>, Pengfei Yan<sup>a\*</sup>, Cheng Wang<sup>a</sup>, Shuxian Li<sup>b</sup>, Yang Pan<sup>b</sup>

<sup>a</sup> School of Chemistry and Materials Science, Heilongjiang University, , Harbin 150080, P. R. China

<sup>b</sup> School of Pharmacy, Jiamusi University, Jiamusi, 154007, P. R. China

Fig.S1 The representation of tetrazolate ring as bent linkers.

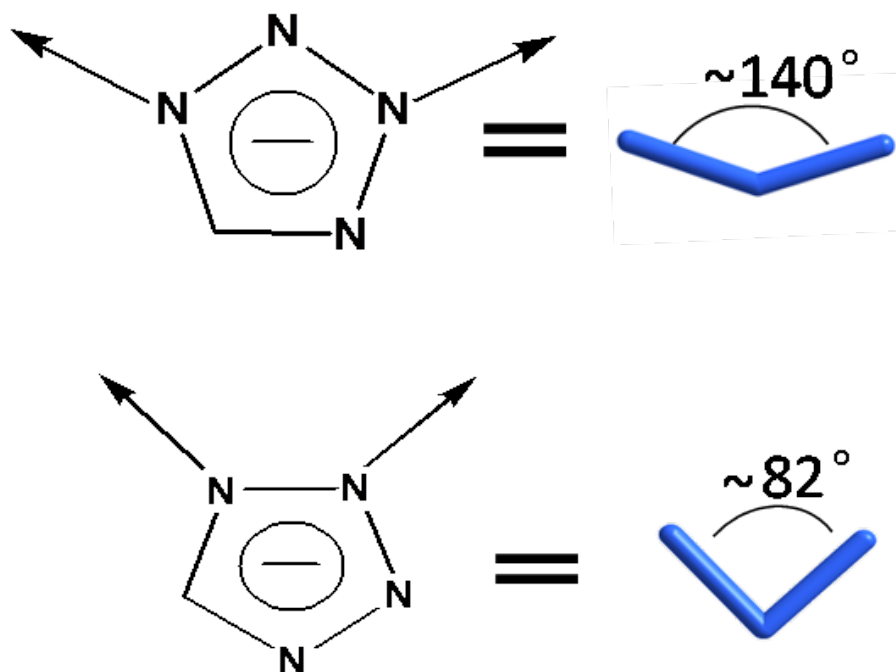

Fig.S2. The simulative and experimental powder X-ray diffraction patterns of the title compound.

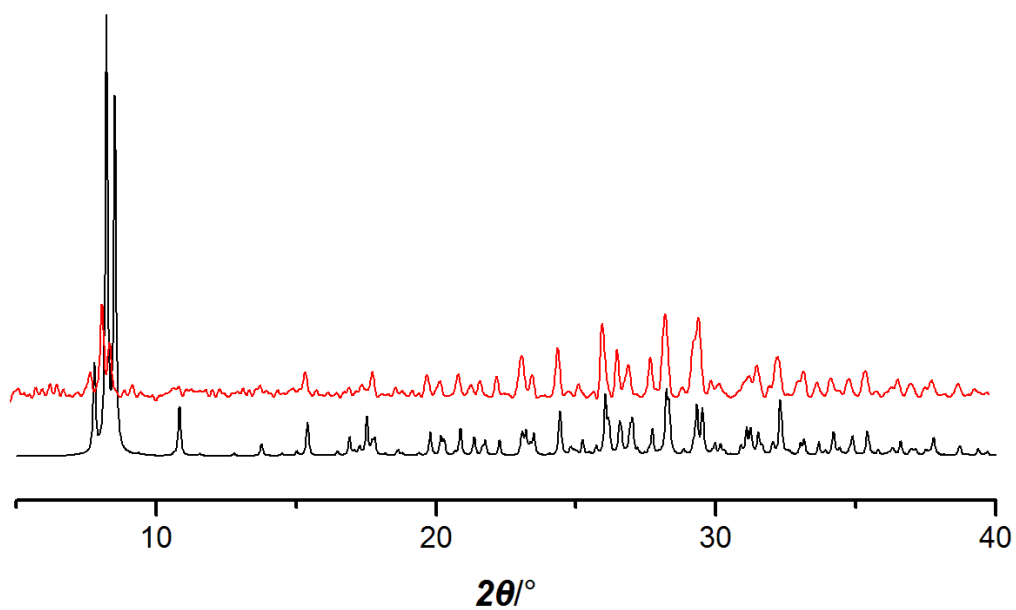

Fig.S3. IR spectrum of the title compound.

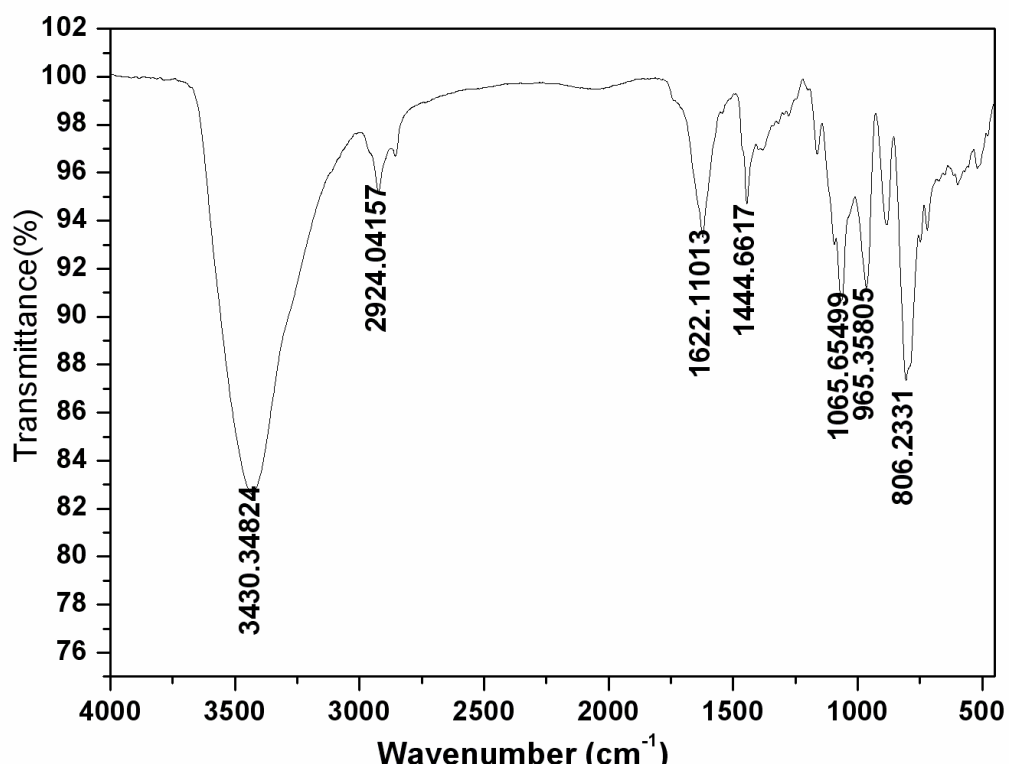

Table S1. Crystal Data and Structure Refinements for the new compound

| Compound                                                                                                 | <b>1</b>                                                                                                        |
|----------------------------------------------------------------------------------------------------------|-----------------------------------------------------------------------------------------------------------------|
| Formula                                                                                                  | C <sub>24</sub> H <sub>16</sub> N <sub>20</sub> K <sub>2</sub> Ag <sub>6</sub> PW <sub>12</sub> O <sub>40</sub> |
| CCDC                                                                                                     | 840486                                                                                                          |
| Fw                                                                                                       | 4187                                                                                                            |
| T (K)                                                                                                    | 296(2)                                                                                                          |
| space group                                                                                              | <b>P2<sub>1</sub>/c</b>                                                                                         |
| <i>a</i> (Å)                                                                                             | 10.5554(8)                                                                                                      |
| <i>b</i> (Å)                                                                                             | 22.6863(18)                                                                                                     |
| <i>c</i> (Å)                                                                                             | 12.4204(10)                                                                                                     |
| $\alpha$ (°)                                                                                             | 90                                                                                                              |
| $\beta$ (°)                                                                                              | 100.712(15)                                                                                                     |
| $\gamma$ (°)                                                                                             | 90                                                                                                              |
| <i>V</i> (Å <sup>3</sup> )                                                                               | 2922.4(3)                                                                                                       |
| <i>Z</i>                                                                                                 | 2                                                                                                               |
| <i>D<sub>c</sub></i> (g·cm <sup>-3</sup> )                                                               | 4.758                                                                                                           |
| $\mu$ (mm <sup>-1</sup> )                                                                                | 25.749                                                                                                          |
| <i>F</i> (000)                                                                                           | 3686                                                                                                            |
| final <i>R</i> <sup><i>a</i></sup> , <i>wR</i> <sup><i>b</i></sup> [ <i>I</i> > 2 $\sigma$ ( <i>I</i> )] | 0.0582, 0.1408                                                                                                  |
| final <i>R</i> <sup><i>a</i></sup> , <i>wR</i> <sup><i>b</i></sup> (all data)                            | 0.0817, 0.1532                                                                                                  |
| GOF on <i>F</i> <sup>2</sup>                                                                             | 1.042                                                                                                           |

$${}^a R_1 = \sum \|F_o\| - \|F_c\| / \sum \|F_o\|, \quad {}^b wR_2 = \{\sum [w(F_o^2 - F_c^2)^2] / \sum [w(F_o^2)^2]\}^{1/2}$$

Table S2. Bond lengths [Å] and angles [°] for the title compound.

|              |           |               |           |
|--------------|-----------|---------------|-----------|
| N(9)-Ag(3)#1 | 2.303(16) | O(96)-O(23)#5 | 1.57(3)   |
| N(10)-Ag(3)  | 2.215(16) | N(7)-Ag(2)#2  | 2.168(16) |
| N(1)-Ag(1)   | 2.329(16) | N(2)-Ag(1)    | 2.248(17) |
| N(3)-Ag(2)   | 2.175(15) | O(8)-W(4)#5   | 1.84(2)   |
| N(6)-Ag(3)#3 | 2.356(17) | O(99)-W(5)#5  | 2.516(13) |
| O(2)-K(1)#4  | 2.81(2)   | O(19)-W(3)    | 1.879(14) |
| O(7)-W(6)    | 1.869(18) | O(20)-W(2)#5  | 1.905(16) |
| O(10)-W(6)   | 1.672(15) | O(98)-K(1)#1  | 2.72(2)   |
| O(10)-Ag(1)  | 2.470(15) | P(2)-O(23)#5  | 1.448(14) |
| O(11)-W(6)   | 1.879(17) | P(2)-O(96)#5  | 1.539(13) |

|                     |           |                      |           |
|---------------------|-----------|----------------------|-----------|
| O(11)-W(1)          | 1.883(17) | P(2)-O(1)#5          | 1.540(13) |
| O(12)-W(3)          | 1.867(15) | P(2)-O(99)#5         | 1.571(16) |
| O(12)-W(2)#5        | 1.891(14) | Ag(1)-O(14)#6        | 2.535(17) |
| O(13)-W(3)          | 1.660(15) | Ag(1)-Ag(2)          | 3.196(2)  |
| O(14)-W(1)          | 1.666(16) | Ag(2)-N(7)#7         | 2.168(16) |
| O(14)-Ag(1)#1       | 2.535(17) | Ag(3)-N(9)#6         | 2.303(16) |
| O(14)-K(1)#1        | 3.217(17) | Ag(3)-N(6)#8         | 2.356(17) |
| O(15)-W(5)          | 1.882(13) | Ag(3)-K(1)#8         | 3.695(5)  |
| O(15)-W(1)#5        | 1.894(13) | W(1)-O(15)#5         | 1.894(13) |
| W(2)-O(23)#5        | 2.442(13) | W(1)-K(1)#1          | 3.807(5)  |
| W(2)-K(1)#1         | 3.790(5)  | W(2)-O(12)#5         | 1.891(14) |
| W(4)-O(8)#5         | 1.84(2)   | W(2)-O(20)#5         | 1.905(16) |
| O(23)-O(96)#5       | 1.57(3)   | W(5)-O(99)#5         | 2.516(13) |
| O(23)-O(99)         | 1.6941    | K(1)-C(8)#3          | 2.71(2)   |
| O(23)-W(2)#5        | 2.442(13) | K(1)-C(12)#3         | 2.71(3)   |
| O(23)-W(3)          | 2.516(13) | K(1)-O(98)#6         | 2.72(2)   |
| O(23)-W(4)          | 2.523(16) | K(1)-O(2)#9          | 2.81(2)   |
| K(1)-O(14)#6        | 3.217(17) | C(12)-K(1)#8         | 2.71(3)   |
| K(1)-O(18)#6        | 3.23(2)   | C(10)-N(6)-N(4)      | 107.3(17) |
| K(1)-Ag(3)#3        | 3.695(5)  | C(10)-N(6)-Ag(3)#3   | 132.0(14) |
| C(7)-K(1)#2         | 2.98(3)   | N(4)-N(6)-Ag(3)#3    | 120.6(14) |
| C(8)-K(1)#8         | 2.71(2)   | C(10)-N(6)-K(1)      | 142.1(13) |
| C(11)-K(1)#2        | 2.82(3)   | N(4)-N(6)-K(1)       | 43.8(11)  |
| Ag(1)-N(2)-K(1)     | 97.2(6)   | Ag(3)#3-N(6)-K(1)    | 81.8(6)   |
| W(4)-O(2)-K(1)#4    | 142.4(11) | W(4)-O(5)-W(1)       | 137.0(14) |
| W(6)-O(10)-Ag(1)    | 156.1(10) | W(6)-O(7)-W(2)       | 139.5(11) |
| W(6)-O(11)-W(1)     | 139.6(11) | W(4)#5-O(8)-W(5)     | 141.3(13) |
| W(1)-O(14)-Ag(1)#1  | 146.5(9)  | W(3)-O(12)-W(2)#5    | 138.4(9)  |
| W(5)-O(15)-W(1)#5   | 138.3(8)  | Ag(1)#1-O(14)-K(1)#1 | 96.4(5)   |
| W(3)-O(1)-W(6)      | 93.4(5)   | P(2)-O(1)-W(3)       | 129.4(8)  |
| P(2)-O(1)-W(5)      | 120.6(8)  | O(23)-O(1)-W(3)      | 75.9(3)   |
| O(23)-O(1)-W(5)     | 132.7(3)  | P(2)-O(1)-W(6)       | 120.1(7)  |
| W(3)-O(1)-W(5)      | 93.6(4)   | O(23)-O(1)-W(6)      | 135.7(4)  |
| N(1)-N(9)-Ag(3)#1   | 128.0(12) | P(2)-O(23)-O(96)#5   | 61.2(9)   |
| C(2)-N(9)-Ag(3)#1   | 123.1(13) | P(2)-O(23)-O(1)      | 58.8(5)   |
| O(96)#5-O(23)-O(99) | 100.3(9)  | O(96)#5-O(23)-O(1)   | 96.2(10)  |
| O(1)-O(23)-O(99)    | 94.1      | P(2)-O(23)-O(99)     | 59.4(6)   |
| C(11)-N(7)-Ag(2)#2  | 122.7(15) | P(2)-O(23)-W(2)#5    | 128.4(8)  |
| C(8)-N(7)-Ag(2)#2   | 118.7(14) | O(96)#5-O(23)-W(2)#5 | 67.2(9)   |
| N(2)-N(5)-C(10)     | 105.0(18) | O(1)-O(23)-W(2)#5    | 130.3(3)  |
| O(99)-O(23)-W(2)#5  | 133.8(3)  | O(96)#5-P(2)-O(1)#5  | 77.0(6)   |
| P(2)-O(23)-W(3)     | 122.8(7)  | O(96)-P(2)-O(1)#5    | 103.0(6)  |
| O(96)#5-O(23)-W(3)  | 129.6(12) | O(23)-P(2)-O(1)      | 67.7(6)   |
| O(1)-O(23)-W(3)     | 64.1(3)   | O(23)#5-P(2)-O(1)    | 112.3(6)  |

---

|                      |           |                      |          |
|----------------------|-----------|----------------------|----------|
| O(99)-O(23)-W(3)     | 125.5(3)  | O(96)#5-P(2)-O(1)    | 103.0(6) |
| W(2)#5-O(23)-W(3)    | 90.2(4)   | O(96)-P(2)-O(1)      | 77.0(6)  |
| P(2)-O(23)-W(4)      | 124.3(8)  | O(1)#5-P(2)-O(1)     | 180.0    |
| O(96)#5-O(23)-W(4)   | 133.3(12) | O(23)-P(2)-O(99)     | 68.1(7)  |
| O(1)-O(23)-W(4)      | 127.4(3)  | O(23)#5-P(2)-O(99)   | 111.9(7) |
| O(99)-O(23)-W(4)     | 64.9(3)   | O(96)#5-P(2)-O(99)   | 107.4(6) |
| W(2)#5-O(23)-W(4)    | 91.0(5)   | O(96)-P(2)-O(99)     | 72.6(6)  |
| W(3)-O(23)-W(4)      | 88.9(5)   | O(1)#5-P(2)-O(99)    | 75.5(9)  |
| P(2)-O(96)-O(23)#5   | 55.6(8)   | O(1)-P(2)-O(99)      | 104.5(9) |
| P(2)-O(96)-W(2)      | 130.2(8)  | O(23)-P(2)-O(99)#5   | 111.9(7) |
| O(23)#5-O(96)-W(2)   | 74.6(10)  | O(23)#5-P(2)-O(99)#5 | 68.1(7)  |
| P(2)-O(96)-W(1)      | 121.2(8)  | O(96)#5-P(2)-O(99)#5 | 72.6(6)  |
| O(23)#5-O(96)-W(1)   | 137.0(12) | O(96)-P(2)-O(99)#5   | 107.4(6) |
| W(2)-O(96)-W(1)      | 94.3(5)   | O(1)#5-P(2)-O(99)#5  | 104.5(9) |
| P(2)-O(99)-O(23)     | 52.5(5)   | O(1)-P(2)-O(99)#5    | 75.5(9)  |
| P(2)-O(99)-W(4)      | 127.2(7)  | O(99)-P(2)-O(99)#5   | 180.0(7) |
| O(23)-O(99)-W(4)     | 74.7(3)   | N(2)-Ag(1)-N(1)      | 155.2(6) |
| P(2)-O(99)-W(1)      | 121.9(7)  | N(2)-Ag(1)-O(10)     | 109.0(6) |
| O(23)-O(99)-W(1)     | 137.0(3)  | N(1)-Ag(1)-O(10)     | 95.7(6)  |
| W(4)-O(99)-W(1)      | 94.9(5)   | N(2)-Ag(1)-O(14)#6   | 97.8(6)  |
| P(2)-O(99)-W(5)#5    | 119.4(7)  | N(1)-Ag(1)-O(14)#6   | 78.7(5)  |
| O(23)-O(99)-W(5)#5   | 130.3(3)  | O(10)-Ag(1)-O(14)#6  | 92.4(6)  |
| W(4)-O(99)-W(5)#5    | 93.4(5)   | N(2)-Ag(1)-Ag(2)     | 92.7(5)  |
| W(1)-O(99)-W(5)#5    | 91.2(5)   | N(1)-Ag(1)-Ag(2)     | 62.5(4)  |
| W(5)-O(16)-W(6)      | 137.1(10) | O(10)-Ag(1)-Ag(2)    | 157.7(4) |
| W(2)-O(18)-K(1)#1    | 96.7(7)   | O(14)#6-Ag(1)-Ag(2)  | 79.0(4)  |
| W(3)-O(19)-W(4)      | 139.5(9)  | N(7)#7-Ag(2)-N(3)    | 163.0(6) |
| W(4)-O(20)-W(2)#5    | 139.9(9)  | N(7)#7-Ag(2)-Ag(1)   | 95.4(4)  |
| W(6)-O(22)-W(3)      | 140.7(14) | N(3)-Ag(2)-Ag(1)     | 67.8(4)  |
| W(2)-O(98)-W(1)      | 137.7(12) | N(10)-Ag(3)-N(9)#6   | 138.4(6) |
| W(2)-O(98)-K(1)#1    | 110.0(9)  | N(10)-Ag(3)-N(6)#8   | 123.7(6) |
| W(1)-O(98)-K(1)#1    | 109.6(8)  | N(9)#6-Ag(3)-N(6)#8  | 97.8(6)  |
| O(23)-P(2)-O(23)#5   | 180.0(10) | N(10)-Ag(3)-K(1)#8   | 94.4(4)  |
| O(23)-P(2)-O(96)#5   | 63.2(10)  | N(9)#6-Ag(3)-K(1)#8  | 105.9(4) |
| O(23)#5-P(2)-O(96)#5 | 116.8(10) | N(6)#8-Ag(3)-K(1)#8  | 59.1(5)  |
| O(23)-P(2)-O(96)     | 116.8(10) | O(14)-W(1)-O(11)     | 101.4(9) |
| O(23)#5-P(2)-O(96)   | 63.2(10)  | O(14)-W(1)-O(15)#5   | 99.8(8)  |
| O(96)#5-P(2)-O(96)   | 180.0(9)  | O(11)-W(1)-O(15)#5   | 158.6(8) |
| O(23)-P(2)-O(1)#5    | 112.3(5)  | O(14)-W(1)-O(98)     | 99.2(9)  |
| O(23)#5-P(2)-O(1)#5  | 67.7(5)   | O(11)-W(1)-O(98)     | 85.9(8)  |
| O(15)#5-W(1)-O(98)   | 87.9(7)   | O(18)-W(2)-K(1)#1    | 57.7(7)  |
| O(14)-W(1)-O(5)      | 101.6(9)  | O(98)-W(2)-K(1)#1    | 42.4(7)  |
| O(11)-W(1)-O(5)      | 90.7(9)   | O(12)#5-W(2)-K(1)#1  | 95.9(5)  |
| O(15)#5-W(1)-O(5)    | 87.7(7)   | O(20)#5-W(2)-K(1)#1  | 160.6(5) |

---

---

|                      |           |                      |           |
|----------------------|-----------|----------------------|-----------|
| O(98)-W(1)-O(5)      | 159.2(10) | O(7)-W(2)-K(1)#1     | 98.0(6)   |
| O(14)-W(1)-O(99)     | 158.4(7)  | O(96)-W(2)-K(1)#1    | 106.8(4)  |
| O(11)-W(1)-O(99)     | 94.3(8)   | O(23)#5-W(2)-K(1)#1  | 134.1(4)  |
| O(15)#5-W(1)-O(99)   | 66.1(6)   | O(13)-W(3)-O(12)     | 100.9(8)  |
| O(98)-W(1)-O(99)     | 96.7(7)   | O(13)-W(3)-O(19)     | 101.2(8)  |
| O(5)-W(1)-O(99)      | 63.0(8)   | O(12)-W(3)-O(19)     | 90.1(6)   |
| O(14)-W(1)-O(96)     | 157.2(7)  | O(13)-W(3)-O(22)     | 103.0(10) |
| O(11)-W(1)-O(96)     | 66.3(7)   | O(12)-W(3)-O(22)     | 156.1(9)  |
| O(15)#5-W(1)-O(96)   | 92.7(5)   | O(19)-W(3)-O(22)     | 84.9(8)   |
| O(98)-W(1)-O(96)     | 62.1(7)   | O(13)-W(3)-O(9)      | 104.3(10) |
| O(5)-W(1)-O(96)      | 97.8(8)   | O(12)-W(3)-O(9)      | 86.9(8)   |
| O(99)-W(1)-O(96)     | 44.2(3)   | O(19)-W(3)-O(9)      | 154.5(9)  |
| O(14)-W(1)-K(1)#1    | 56.9(6)   | O(22)-W(3)-O(9)      | 87.6(8)   |
| O(11)-W(1)-K(1)#1    | 94.8(7)   | O(13)-W(3)-O(1)      | 161.3(7)  |
| O(15)#5-W(1)-K(1)#1  | 94.4(4)   | O(12)-W(3)-O(1)      | 92.7(6)   |
| O(98)-W(1)-K(1)#1    | 42.3(7)   | O(19)-W(3)-O(1)      | 91.5(6)   |
| O(5)-W(1)-K(1)#1     | 158.5(8)  | O(22)-W(3)-O(1)      | 64.1(8)   |
| O(99)-W(1)-K(1)#1    | 136.9(4)  | O(9)-W(3)-O(1)       | 63.4(8)   |
| O(96)-W(1)-K(1)#1    | 103.4(3)  | O(13)-W(3)-O(23)     | 158.7(7)  |
| O(18)-W(2)-O(98)     | 100.0(10) | O(12)-W(3)-O(23)     | 64.5(5)   |
| O(18)-W(2)-O(12)#5   | 103.5(8)  | O(19)-W(3)-O(23)     | 65.2(6)   |
| O(98)-W(2)-O(12)#5   | 88.6(7)   | O(22)-W(3)-O(23)     | 92.3(8)   |
| O(18)-W(2)-O(20)#5   | 102.9(8)  | O(9)-W(3)-O(23)      | 90.8(9)   |
| O(98)-W(2)-O(20)#5   | 157.0(9)  | O(1)-W(3)-O(23)      | 40.0(2)   |
| O(12)#5-W(2)-O(20)#5 | 88.1(7)   | O(2)-W(4)-O(8)#5     | 101.9(11) |
| O(18)-W(2)-O(7)      | 100.7(9)  | O(2)-W(4)-O(20)      | 104.0(9)  |
| O(98)-W(2)-O(7)      | 88.4(8)   | O(8)#5-W(4)-O(20)    | 88.9(8)   |
| O(12)#5-W(2)-O(7)    | 155.8(8)  | O(2)-W(4)-O(5)       | 98.9(11)  |
| O(20)#5-W(2)-O(7)    | 85.4(7)   | O(8)#5-W(4)-O(5)     | 86.4(9)   |
| O(18)-W(2)-O(96)     | 158.8(8)  | O(20)-W(4)-O(5)      | 157.1(10) |
| O(98)-W(2)-O(96)     | 65.3(8)   | O(2)-W(4)-O(19)      | 102.9(9)  |
| O(12)#5-W(2)-O(96)   | 91.8(6)   | O(8)#5-W(4)-O(19)    | 154.8(10) |
| O(20)#5-W(2)-O(96)   | 92.1(6)   | O(20)-W(4)-O(19)     | 89.4(7)   |
| O(7)-W(2)-O(96)      | 65.2(7)   | O(5)-W(4)-O(19)      | 85.5(8)   |
| O(18)-W(2)-O(23)#5   | 162.9(7)  | O(2)-W(4)-O(99)      | 158.3(8)  |
| O(98)-W(2)-O(23)#5   | 93.3(8)   | O(8)#5-W(4)-O(99)    | 64.6(8)   |
| O(12)#5-W(2)-O(23)#5 | 66.0(6)   | O(20)-W(4)-O(99)     | 93.1(6)   |
| O(20)#5-W(2)-O(23)#5 | 64.7(6)   | O(5)-W(4)-O(99)      | 64.7(9)   |
| O(7)-W(2)-O(23)#5    | 90.2(7)   | O(19)-W(4)-O(99)     | 90.4(6)   |
| O(96)-W(2)-O(23)#5   | 38.2(7)   | O(2)-W(4)-O(23)      | 161.3(8)  |
| O(8)#5-W(4)-O(23)    | 91.9(9)   | N(4)-K(1)-O(98)#6    | 132.9(6)  |
| O(20)-W(4)-O(23)     | 63.3(6)   | C(8)#3-K(1)-O(98)#6  | 83.6(6)   |
| O(5)-W(4)-O(23)      | 94.4(9)   | C(12)#3-K(1)-O(98)#6 | 103.3(7)  |
| O(19)-W(4)-O(23)     | 65.0(6)   | N(4)-K(1)-O(2)#9     | 115.1(6)  |

---

---

|                      |           |                      |          |
|----------------------|-----------|----------------------|----------|
| O(99)-W(4)-O(23)     | 40.4(3)   | C(8)#3-K(1)-O(2)#9   | 95.5(6)  |
| O(21)-W(5)-O(9)      | 104.5(9)  | C(12)#3-K(1)-O(2)#9  | 69.2(6)  |
| O(21)-W(5)-O(15)     | 103.2(7)  | O(98)#6-K(1)-O(2)#9  | 111.7(6) |
| O(9)-W(5)-O(15)      | 88.1(8)   | N(4)-K(1)-C(11)#7    | 88.4(8)  |
| O(21)-W(5)-O(16)     | 100.3(9)  | C(8)#3-K(1)-C(11)#7  | 159.7(7) |
| O(9)-W(5)-O(16)      | 89.3(9)   | C(12)#3-K(1)-C(11)#7 | 170.8(8) |
| O(15)-W(5)-O(16)     | 156.2(8)  | O(98)#6-K(1)-C(11)#7 | 85.1(7)  |
| O(21)-W(5)-O(8)      | 101.9(9)  | O(2)#9-K(1)-C(11)#7  | 104.4(6) |
| O(9)-W(5)-O(8)       | 153.6(10) | N(4)-K(1)-C(7)#7     | 88.3(7)  |
| O(15)-W(5)-O(8)      | 86.0(7)   | C(8)#3-K(1)-C(7)#7   | 170.8(7) |
| O(16)-W(5)-O(8)      | 86.0(10)  | C(12)#3-K(1)-C(7)#7  | 143.5(7) |
| O(21)-W(5)-O(99)#5   | 157.6(7)  | O(98)#6-K(1)-C(7)#7  | 105.4(7) |
| O(9)-W(5)-O(99)#5    | 93.9(8)   | O(2)#9-K(1)-C(7)#7   | 79.3(6)  |
| O(15)-W(5)-O(99)#5   | 64.1(6)   | C(11)#7-K(1)-C(7)#7  | 27.7(7)  |
| O(16)-W(5)-O(99)#5   | 92.5(7)   | N(4)-K(1)-N(6)       | 22.8(5)  |
| O(8)-W(5)-O(99)#5    | 60.4(8)   | C(8)#3-K(1)-N(6)     | 99.0(6)  |
| O(21)-W(5)-O(1)      | 157.9(6)  | C(12)#3-K(1)-N(6)    | 90.1(7)  |
| O(9)-W(5)-O(1)       | 60.0(8)   | O(98)#6-K(1)-N(6)    | 153.2(5) |
| O(15)-W(5)-O(1)      | 92.4(5)   | O(2)#9-K(1)-N(6)     | 94.6(5)  |
| O(16)-W(5)-O(1)      | 66.0(7)   | C(11)#7-K(1)-N(6)    | 83.7(7)  |
| O(8)-W(5)-O(1)       | 94.5(8)   | C(7)#7-K(1)-N(6)     | 74.0(6)  |
| O(99)#5-W(5)-O(1)    | 44.4(6)   | N(4)-K(1)-O(14)#6    | 80.3(5)  |
| C(11)#7-K(1)-O(18)#6 | 66.1(7)   | O(2)#9-K(1)-O(18)#6  | 69.6(5)  |
| C(8)#3-K(1)-O(18)#6  | 118.6(6)  | N(6)-K(1)-O(18)#6    | 139.8(5) |
| N(4)-K(1)-C(8)#3     | 87.0(7)   | O(14)#6-K(1)-O(18)#6 | 105.2(4) |
| N(4)-K(1)-C(12)#3    | 88.6(8)   | N(4)-K(1)-N(2)       | 16.9(5)  |
| C(8)#3-K(1)-C(12)#3  | 28.5(7)   | C(8)#3-K(1)-N(2)     | 89.0(6)  |
| C(12)#3-K(1)-N(2)    | 98.2(7)   | O(18)#6-K(1)-Ag(3)#3 | 114.9(3) |
| O(98)#6-K(1)-N(2)    | 116.7(5)  | C(8)#3-K(1)-Ag(3)#3  | 99.9(5)  |
| O(2)#9-K(1)-N(2)     | 131.6(6)  | C(12)#3-K(1)-Ag(3)#3 | 76.1(6)  |
| C(11)#7-K(1)-N(2)    | 81.0(7)   | O(98)#6-K(1)-Ag(3)#3 | 166.9(4) |
| C(7)#7-K(1)-N(2)     | 88.8(6)   | O(2)#9-K(1)-Ag(3)#3  | 55.5(4)  |
| O(14)#6-K(1)-N(2)    | 66.0(4)   | C(7)#7-K(1)-Ag(3)#3  | 70.9(5)  |
| O(18)#6-K(1)-N(2)    | 145.7(5)  | N(6)-K(1)-Ag(3)#3    | 39.1(3)  |

---

Symmetry transformations used to generate equivalent atoms: #1  $x, -y+3/2, z+1/2$ ; #2  $x-1, y, z$ ; #3  $x+1, -y+3/2, z+1/2$ ; #4  $x-1, -y+3/2, z+1/2$ ; #5  $-x, -y+2, -z+2$ ; #6  $x, -y+3/2, z-1/2$ ; #7  $x+1, y, z$ ; #8  $x-1, -y+3/2, z-1/2$ ; #9  $x+1, -y+3/2, z-1/2$ .
